# Supplementary material
Source: publisher figshare collection journal article supplement (https://acs.figshare.com/ndownloader/files/9937987)
Supplement: Supplementary file 1 [file 9937987]

# Optical Behaviors and Electronic Properties of Mo<sub>2</sub>–Mo<sub>2</sub> Mixed-Valence Complexes within or beyond the Class III Regime: Testing the Limits of the Two-State Model

Ying Ning Tan,<sup>1,†</sup> Tao Cheng,<sup>1,†</sup> Miao Meng,<sup>1</sup> Yu Yu Zhang,<sup>1</sup> Chun Y. Liu<sup>1,2,\*</sup>, Mei Fang Sun,<sup>2</sup> Yu Zhang,<sup>2</sup> Paul J. Low<sup>3,\*</sup>

## Supporting Information for Review

**Figure S1.** <sup>1</sup>H NMR spectra for the complex [O<sub>2</sub>–O<sub>2</sub>].

**Figure S2.** <sup>1</sup>H NMR spectra for the complex [OS–OS].

**Figure S3.** <sup>1</sup>H NMR spectra for the complexes [S<sub>2</sub>–S<sub>2</sub>].

**Figure S4.** Spectra of electron paramagnetic resonance (EPR) for the cations [O<sub>2</sub>–O<sub>2</sub>]<sup>+</sup>, [OS–OS]<sup>+</sup> and [S<sub>2</sub>–S<sub>2</sub>]<sup>+</sup> in CH<sub>2</sub>Cl<sub>2</sub> solutions.

**Table S1.** Crystallographic data of the complexes [OS–OS] and [S<sub>2</sub>–S<sub>2</sub>].

**Table S2.** Selected bond distances (Å) and angles of the complex [OS–OS].

**Table S3.** Selected bond distances (Å) and angles of the complex [SS–SS].

**Figure S5.** Vis-Near-IR spectra of neutral [O<sub>2</sub>–O<sub>2</sub>] and cation [O<sub>2</sub>–O<sub>2</sub>]<sup>+</sup> in CH<sub>2</sub>Cl<sub>2</sub> solutions.

**Figure S6.** Vis-Near-IR spectra of neutral [OS–OS] and cation [OS–OS]<sup>+</sup> in CH<sub>2</sub>Cl<sub>2</sub> solutions.

**Figure S7.** Vis-Near-IR spectra of neutral [S<sub>2</sub>–S<sub>2</sub>] and cation [S<sub>2</sub>–S<sub>2</sub>]<sup>+</sup> in CH<sub>2</sub>Cl<sub>2</sub> solutions.

**Figure S8.** Vis-Near-IR spectra of the cation [O<sub>2</sub>–O<sub>2</sub>]<sup>+</sup> in various solvents including THF, MeCN and DMF.

**Figure S9.** Vis-Near-IR spectra of the cation [OS–OS]<sup>+</sup> in various solvents including THF, MeCN and DMF.

**Figure S10.** Vis-Near-IR spectra of the cation [S<sub>2</sub>–S<sub>2</sub>]<sup>+</sup> in various solvents including THF, MeCN and DMF.

**Figure S11.** The key frontier molecular orbitals for the computational models of [OO–OO]<sup>+</sup>, [OS–OS]<sup>+</sup> and [SS–SS]<sup>+</sup>.

**Note for Figure 11.**

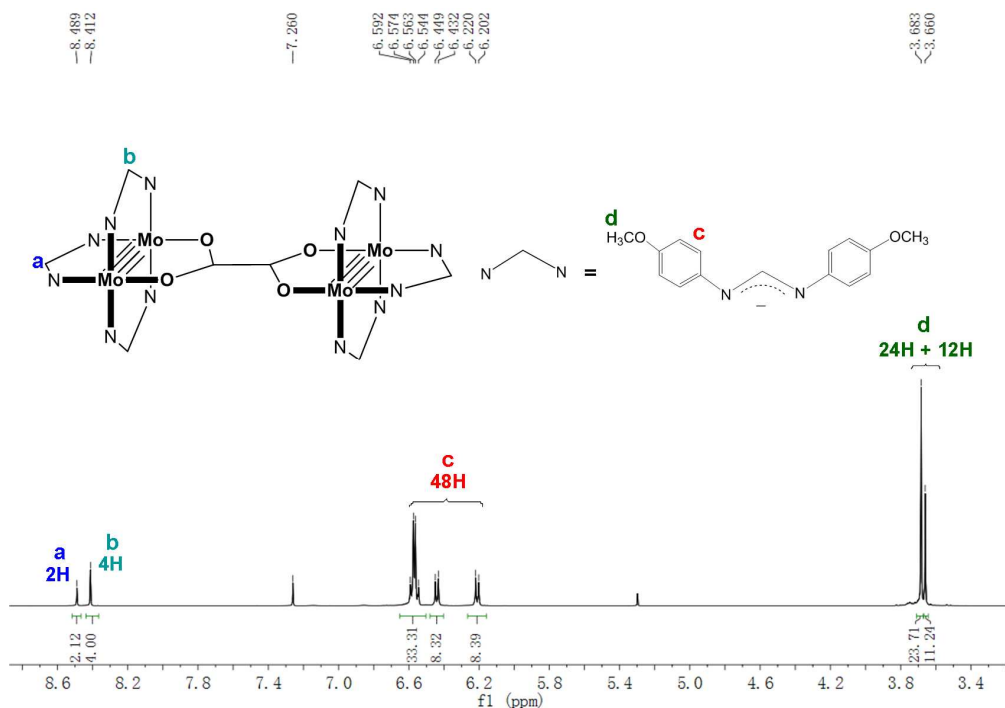

**Figure S1.**  $^1\text{H}$  NMR spectra for the complex  $[\text{O}_2\text{--O}_2]$  in Chloroform-*d*.

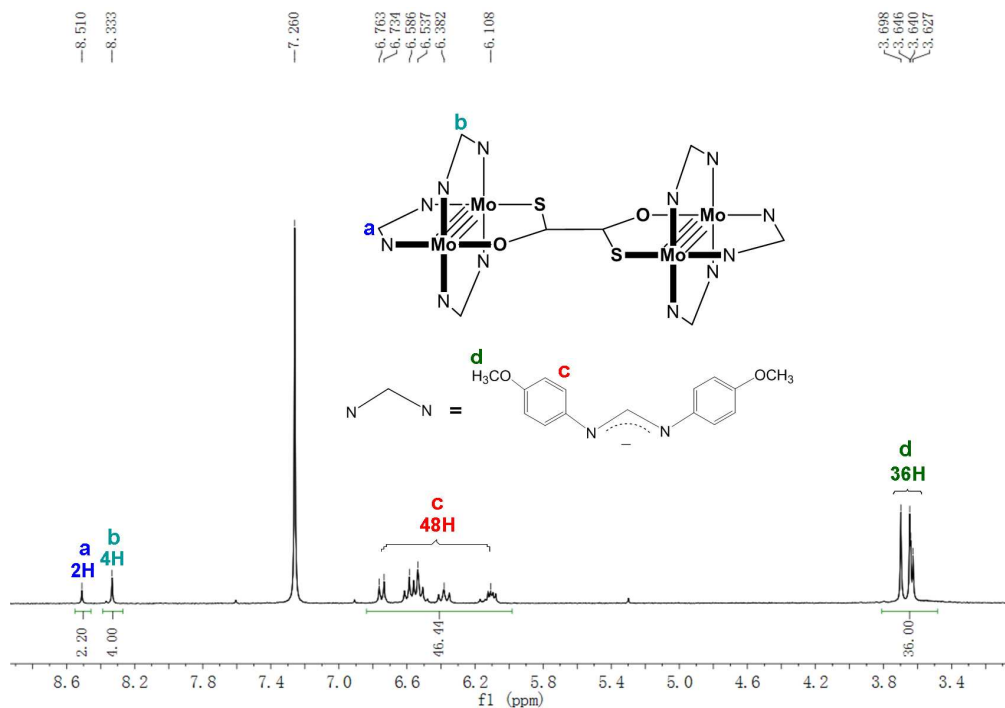

**Figure S2.**  $^1\text{H}$  NMR spectra for the complex  $[\text{OS--OS}]$  in Chloroform-*d*.

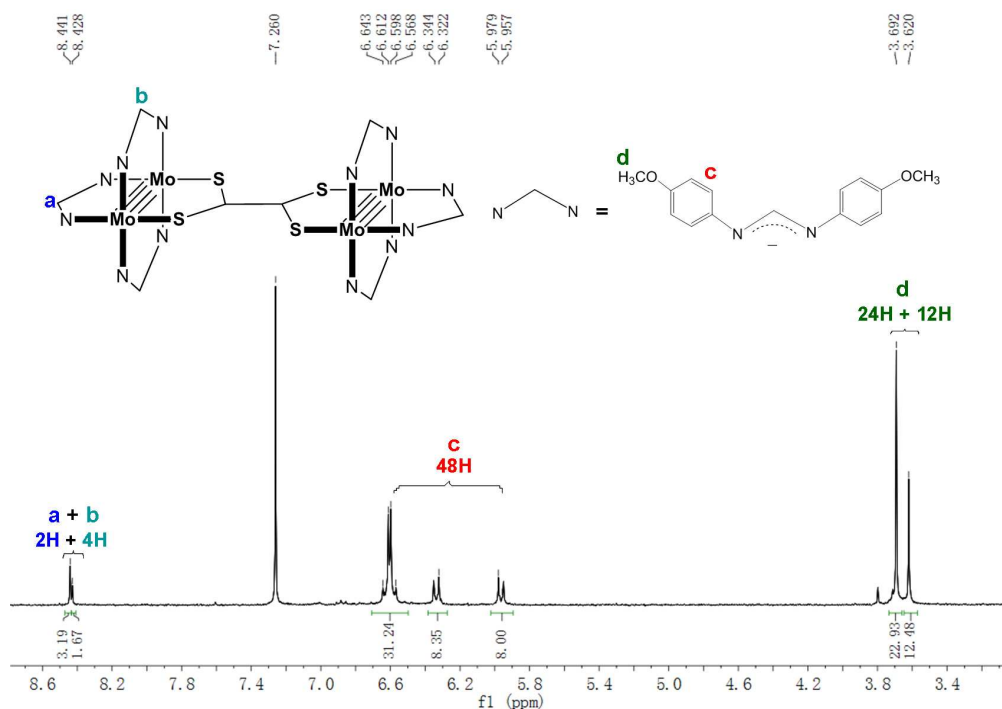

**Figure S3.**  $^1\text{H}$  NMR spectra for the complex  $[\text{S}_2\text{--S}_2]$  in Chloroform- $d$ .

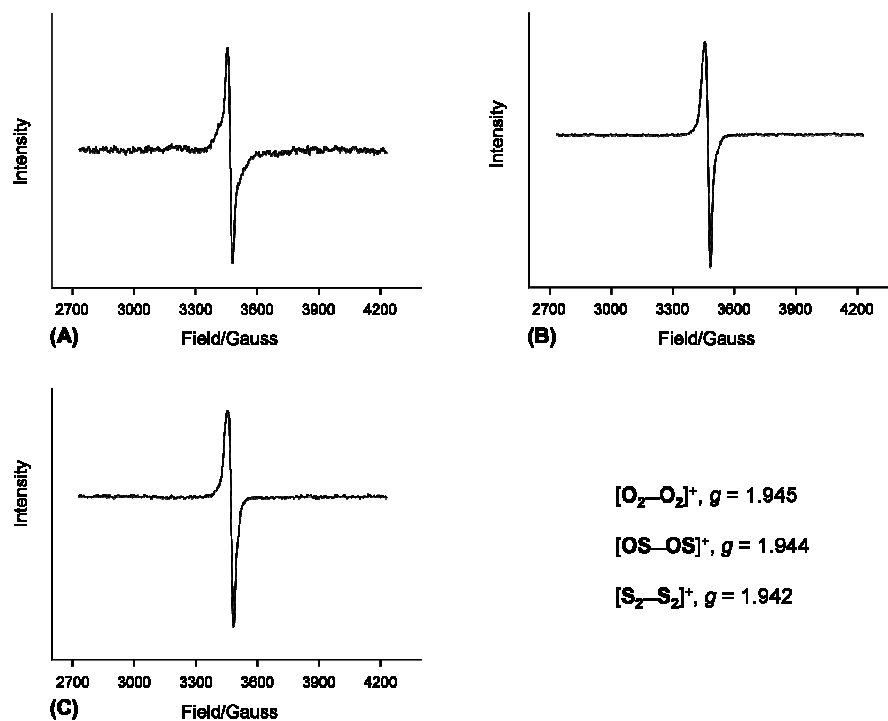

**Figure S4.** Spectra of electron paramagnetic resonance (EPR) for the cations  $[\text{O}_2\text{--O}_2]^+$  (A),  $[\text{OS--OS}]^+$  (B) and  $[\text{S}_2\text{--S}_2]^+$  (C) in  $\text{CH}_2\text{Cl}_2$  solutions at 110 K.

**Table S1.** Crystallographic data for the complexes  $[\text{OS--OS}]$  and  $[\text{S}_2\text{--S}_2]$

|                                                | [OS–OS]·4CH <sub>2</sub> Cl <sub>2</sub>                                                                       | [S <sub>2</sub> –S <sub>2</sub> ]·3CH <sub>2</sub> Cl <sub>2</sub>                                             |
|------------------------------------------------|----------------------------------------------------------------------------------------------------------------|----------------------------------------------------------------------------------------------------------------|
| formula                                        | C <sub>96</sub> H <sub>92</sub> Mo <sub>4</sub> N <sub>12</sub> O <sub>14</sub> S <sub>2</sub> Cl <sub>8</sub> | C <sub>95</sub> H <sub>86</sub> Mo <sub>4</sub> N <sub>12</sub> O <sub>12</sub> S <sub>4</sub> Cl <sub>6</sub> |
| fw                                             | 2369.30                                                                                                        | 2312.45                                                                                                        |
| space group                                    | <i>P</i> $\bar{1}$                                                                                             | <i>P</i> $\bar{1}$                                                                                             |
| <i>a</i> (Å)                                   | 11.2150(3)                                                                                                     | 15.0656(5)                                                                                                     |
| <i>b</i> (Å)                                   | 15.2523(6)                                                                                                     | 15.3202(4)                                                                                                     |
| <i>c</i> (Å)                                   | 16.1339(5)                                                                                                     | 22.8869(7)                                                                                                     |
| $\alpha$ (deg)                                 | 97.592(3)                                                                                                      | 103.864(3)                                                                                                     |
| $\beta$ (deg)                                  | 108.623(3)                                                                                                     | 101.841(3)                                                                                                     |
| $\gamma$ (deg)                                 | 98.590(3)                                                                                                      | 90.522(2)                                                                                                      |
| <i>V</i> (Å <sup>3</sup> )                     | 2537.88(16)                                                                                                    | 5010.0(3)                                                                                                      |
| <i>Z</i>                                       | 1                                                                                                              | 2                                                                                                              |
| <i>T</i> (K)                                   | 173                                                                                                            | 173                                                                                                            |
| <i>d</i> <sub>calcd</sub> (g/cm <sup>3</sup> ) | 1.550                                                                                                          | 1.533                                                                                                          |
| $\mu$ (mm <sup>−1</sup> )                      | 6.828                                                                                                          | 6.788                                                                                                          |
| <i>R</i> <sub>1</sub> <sup><i>a</i></sup>      | 0.0646                                                                                                         | 0.0480                                                                                                         |
| <i>wR</i> <sub>2</sub> <sup><i>b</i></sup>     | 0.1825                                                                                                         | 0.1398                                                                                                         |

$$^a R_1 = \Sigma ||F_o| - |F_c|| / \Sigma |F_o|. \quad ^b wR_2 = [\Sigma [w(F_o^2 - F_c^2)^2] / \Sigma [w(F_o^2)^2]]^{1/2}$$

**Table S2.** Selected bond distances (Å) and angles (deg) for the complex [OS–OS].

---

|                                      |           |
|--------------------------------------|-----------|
| Mo(1)-Mo(2)                          | 2.099(6)  |
| Mo(1)-N(1)                           | 2.136(4)  |
| Mo(1)-N(3)                           | 2.148(6)  |
| Mo(1)-N(5)                           | 2.140(5)  |
| Mo(2)-N(2)                           | 2.165(6)  |
| Mo(2)-N(4)                           | 2.136 (6) |
| Mo(2)-N(6)                           | 2.164(5)  |
| Mo(2)-O(7)                           | 2.082(4)  |
| Mo(1)-S(1)                           | 2.458(2)  |
| C1—C2                                | 1.476(8)  |
| Mo <sub>2</sub> ·····Mo <sub>2</sub> | 7.354(7)  |
| torsion angle                        | 0.22      |

---

**Table S3.** Selected bond distances (Å) and angles (deg) for the complex [SS–SS].

---

|               |          |                                      |          |
|---------------|----------|--------------------------------------|----------|
| Mo(1)-Mo(2)   | 2.101(6) | Mo(3)-Mo(4)                          | 2.109(5) |
| Mo(1)-N(1)    | 2.137(5) | Mo(3)-N(11)                          | 2.145(5) |
| Mo(1)-N(3)    | 2.161(5) | Mo(3)-N(7)                           | 2.152(5) |
| Mo(1)-N(5)    | 2.156(5) | Mo(3)-N(9)                           | 2.158(5) |
| Mo(2)-N(2)    | 2.169(5) | Mo(4)-N(8)                           | 2.155(5) |
| Mo(2)-N(4)    | 2.143(5) | Mo(4)-N(10)                          | 2.131(5) |
| Mo(2)-N(6)    | 2.156(5) | Mo(4)-N(12)                          | 2.142(5) |
| Mo(1)-S(1)    | 2.421(4) | Mo(3)-S(3)                           | 2.415(3) |
| Mo(2)-S(2)    | 2.435(2) | Mo(4)-S(4)                           | 2.421(1) |
| C1—C2         | 1.454(7) | Mo <sub>2</sub> ·····Mo <sub>2</sub> | 7.881(6) |
| torsion angle | 21.53    |                                      |          |

---

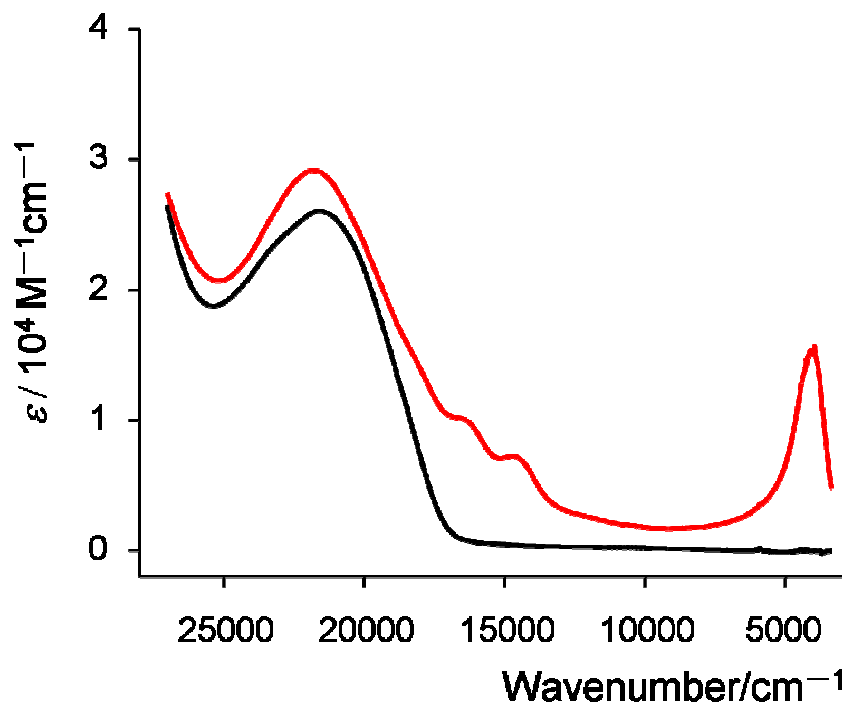

**Figure S5.** Vis-Near-IR spectra of neutral  $[\text{O}_2-\text{O}_2]$ (black) and cation  $[\text{O}_2-\text{O}_2]^+$ (red) in  $\text{CH}_2\text{Cl}_2$  solutions.

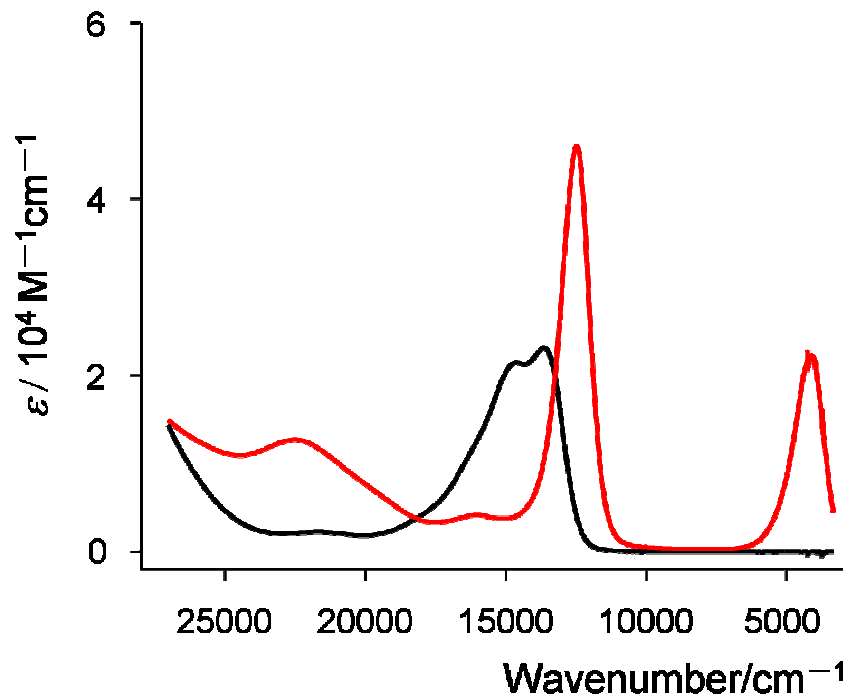

**Figure S6.** Vis-Near-IR spectra of neutral  $[\text{OS}-\text{OS}]$ (black) and cation  $[\text{OS}-\text{OS}]^+$  in  $\text{CH}_2\text{Cl}_2$  solution.

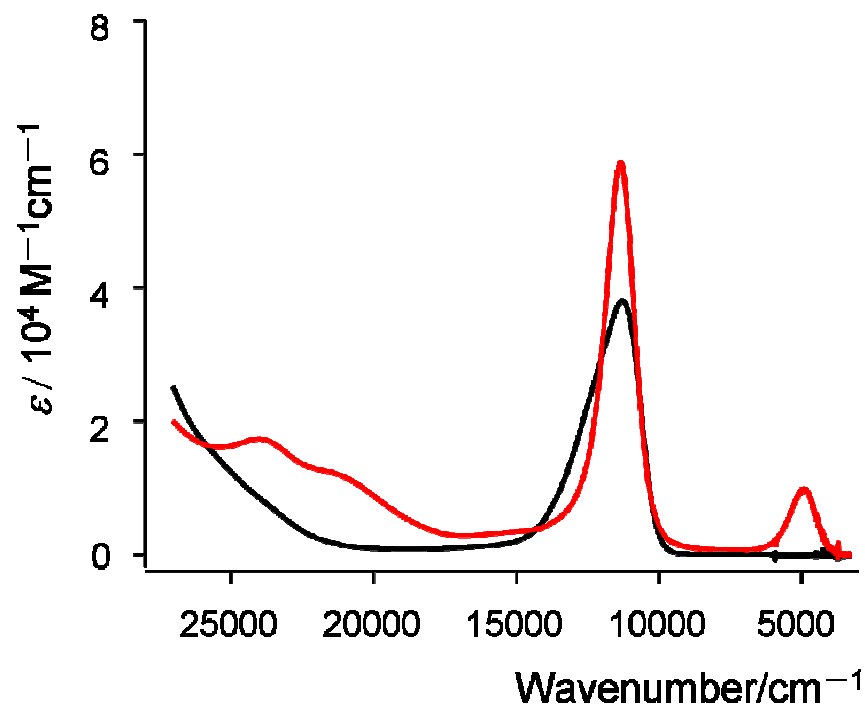

**Figure S7.** Vis-Near-IR spectra of the cation  $[S_2-S_2]^+$  in  $CH_2Cl_2$  solution.

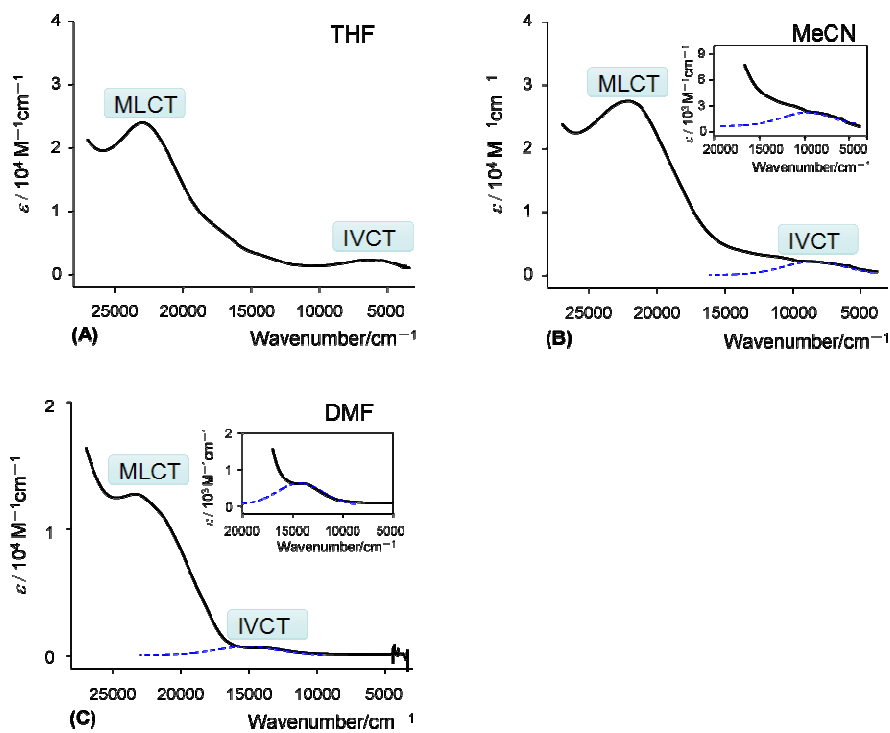

**Figure S8.** Vis-Near-IR spectra of the cation  $[O_2-O_2]^+$  in various solvents including THF (A), MeCN (B) and DMF (C).



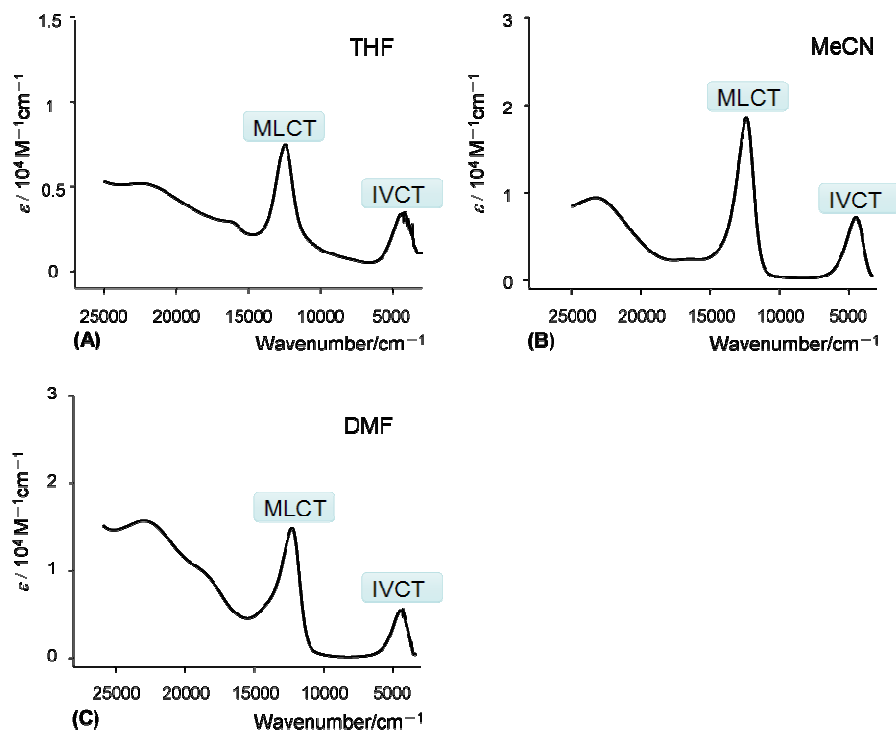

**Figure S9.** Vis-Near-IR spectra of the cation  $[\text{OS-OS}]^+$  in various solvents including THF (A), MeCN (B) and DMF (C).

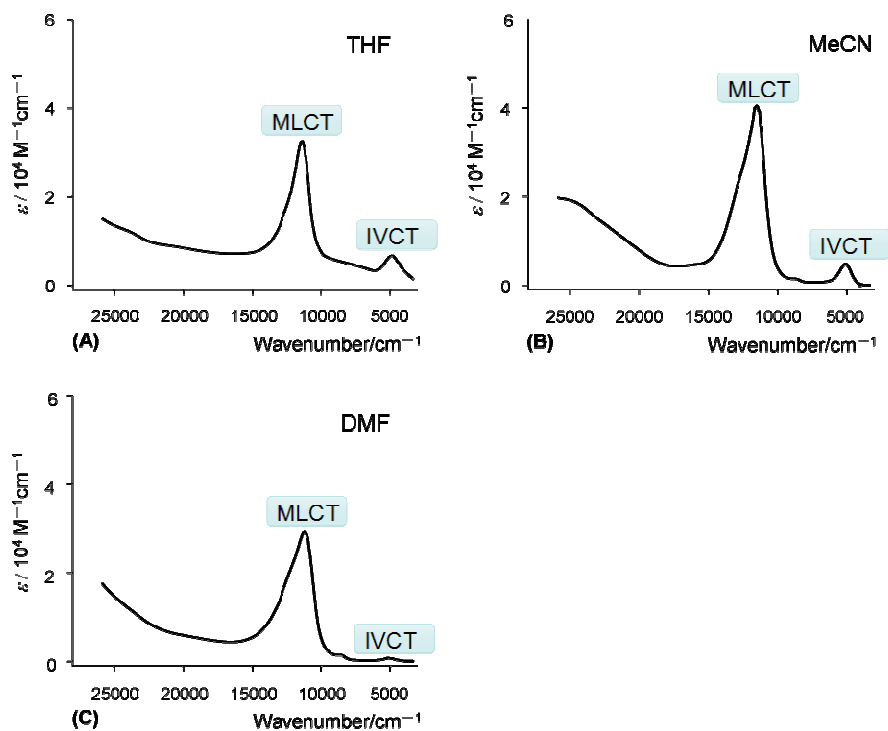

**Figure S10.** Vis-Near-IR spectra of the cation  $[\text{S}_2-\text{S}_2]^+$  in various solvents including THF (A), MeCN (B) and DMF (C).

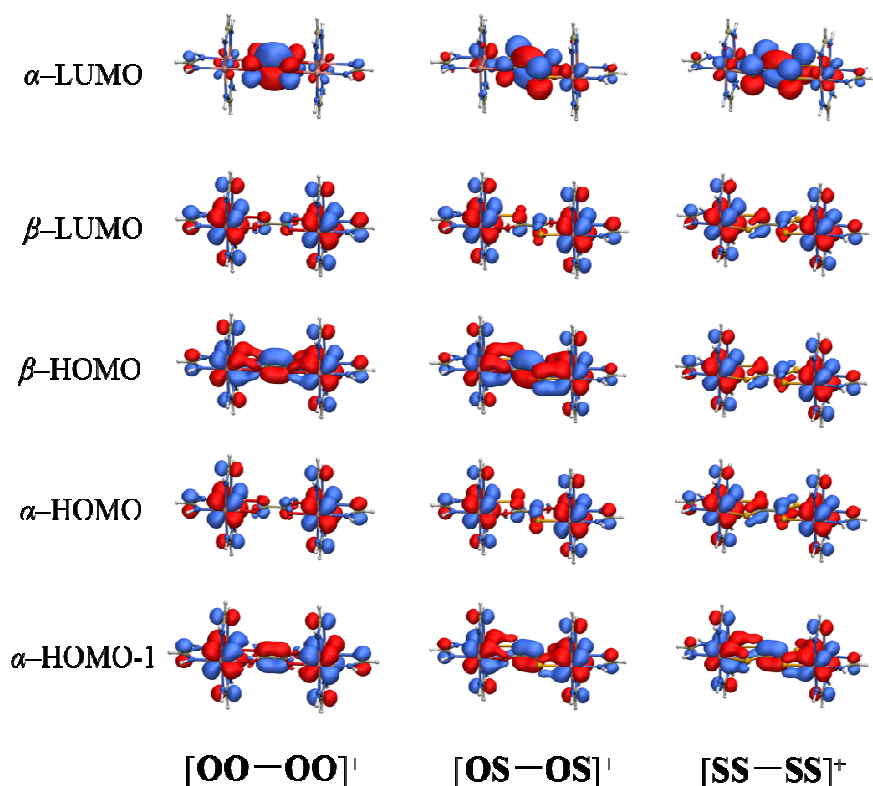

**Figure S11.** The key frontier molecular orbitals for the computational models of  $[\text{OO-OO}]^+$ ,  $[\text{OS-OS}]^+$  and  $[\text{SS-SS}]^+$ .

**Note for Figure 11:** The adiabatic potential surfaces are generated by calculation of the energy ( $E$ ) of the system as a function of nuclear coordinate ( $X$ ). Provided with the coupling parameter ( $H_{\text{ab}}$ ) and reorganization energy ( $\lambda$ ) for a given MV system ( $\Delta G^\circ = 0$  for symmetrical systems), the energies for the ground state (lower surface) and excited state (upper state) are calculated by equations  $E_1 = 0.5[\lambda(2X^2 - 2X+1)] - 0.5[\{\lambda(2X - 1)\}^2 + 4(H_{\text{ab}})^2]^{1/2}$  and  $E_2 = 0.5[\lambda(2X^2 - 2X+1)] + 0.5[\{\lambda(2X - 1)\}^2 + 4(H_{\text{ab}})^2]^{1/2}$ , respectively.
